# Supplementary material for: A new family of Ln–radical chains (Ln = Nd, Sm, Gd, Tb and Dy): synthesis, structure, and magnetic properties
Source: Royal Society of Chemistry journal article supplement (doi:10.1039/c3dt52959b), 2013-11-19
Supplement: c3dt52959b.pdf [file c3dt52959b.pdf]

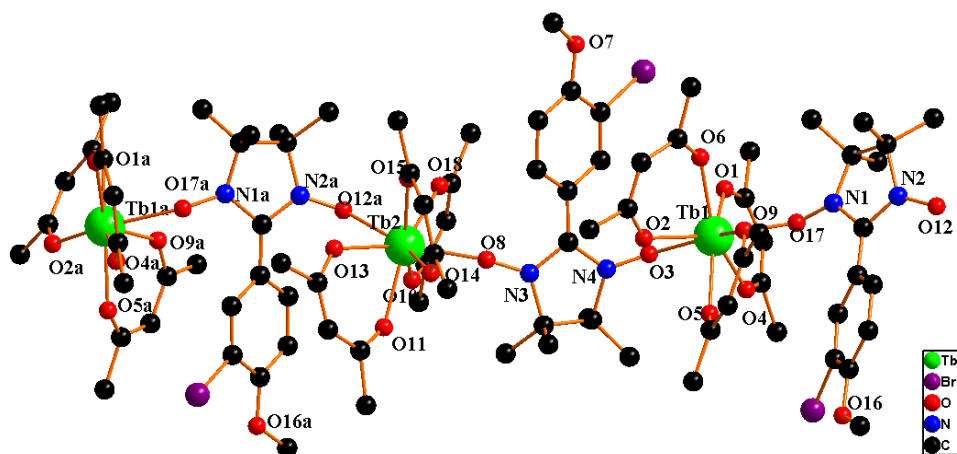

**Figure S3.** Crystal structure of complex 4. All hydrogen and fluorine atoms are omitted for clarity.

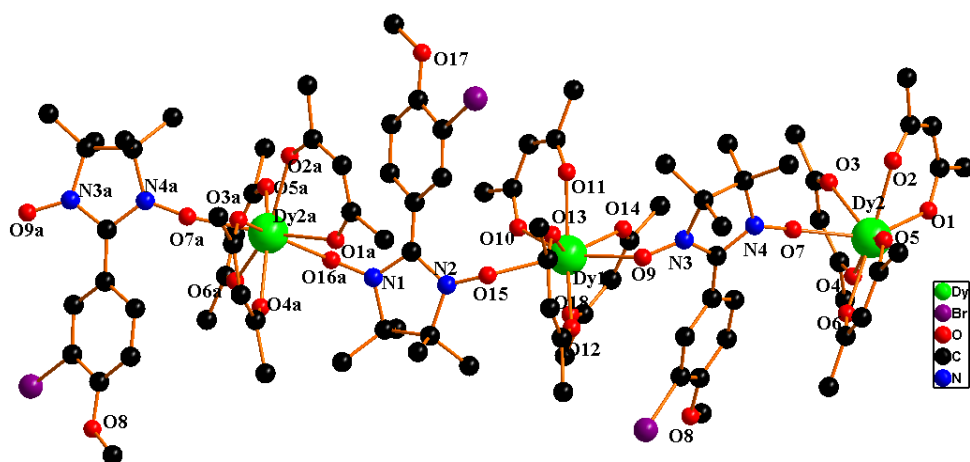

**Figure S4.** Crystal structure of complex 5. All hydrogen and fluorine atoms are omitted for clarity.

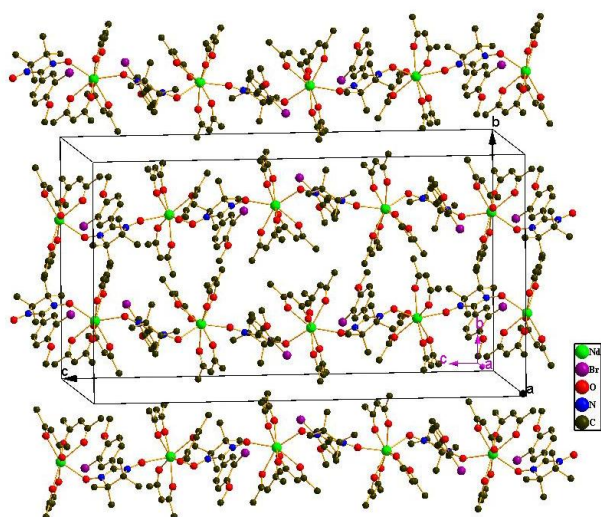

**Figure S5.** Packing diagram of complex 1. All hydrogen and fluorine atoms are not shown for the sake of clarity.

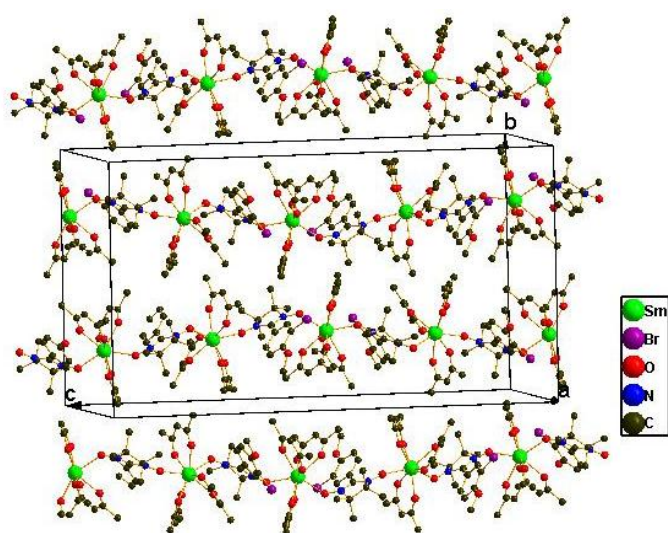

**Figure S6.** Packing diagram of complex 2. All hydrogen and fluorine atoms are not shown for the sake of clarity.

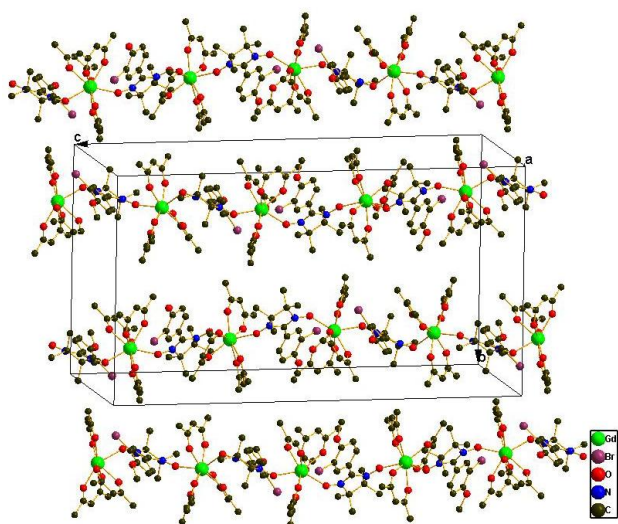

**Figure S7.** Packing diagram of complex 3. All hydrogen and fluorine atoms are not shown for the sake of clarity.

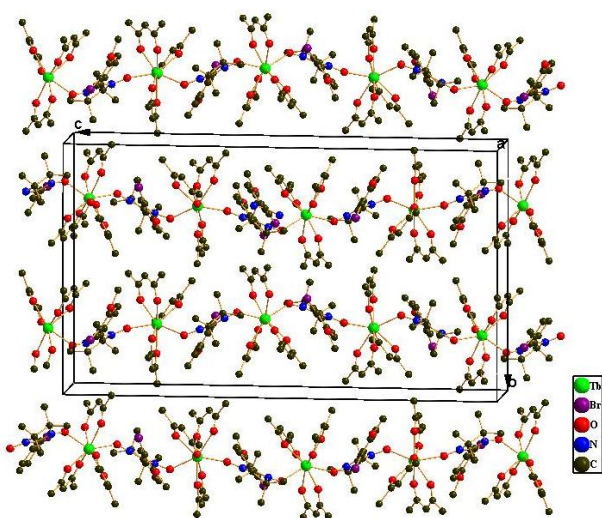

**Figure S8.** Packing diagram of complex 4. All hydrogen and fluorine atoms are not shown for the sake of clarity.

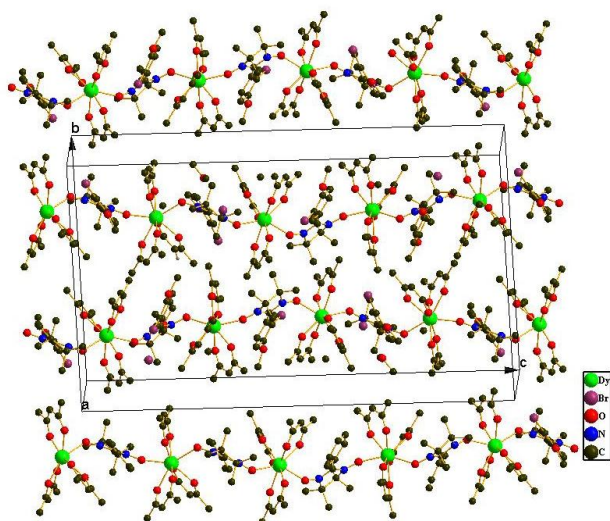

**Figure S9.** Packing diagram of complex **5**. All hydrogen and fluorine atoms are not shown for the sake of clarity.

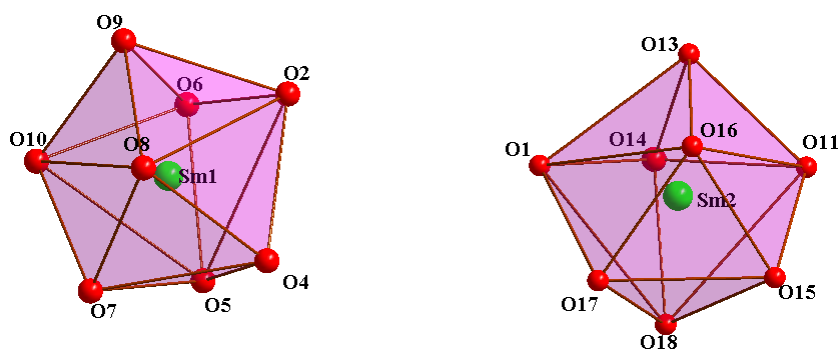

**Figure S10.** The coordination polyhedron of Sm(III) ion in complex **2**.

**Table S1**  $\delta$  ( $^\circ$ ) and  $\varphi$  ( $^\circ$ ) values for complex **2**.

|             | Sm1                                 |      | Sm2                                    |      | TPRS | DD   | SAPR |
|-------------|-------------------------------------|------|----------------------------------------|------|------|------|------|
| $\delta_1$  | O(7)-[O(8)-O(10)]-O(9) <sup>a</sup> | 18.8 | O(13)-[O(11)-O(16)]-O(15) <sup>a</sup> | 18.0 | 0.0  | 29.5 | 0.0  |
| $\delta_2$  | O(4)-[O(2)-O(5)]-O(6) <sup>a</sup>  | 17.8 | O(14)-[O(1)-O(18)]-O(17) <sup>a</sup>  | 29.3 | 21.8 | 29.5 | 0.0  |
| $\delta_3$  | O(7)-[O(5)-O(10)]-O(6) <sup>a</sup> | 35.1 | O(13)-[O(16)-O(1)]-O(17) <sup>a</sup>  | 30.9 | 48.2 | 29.5 | 52.4 |
| $\delta_4$  | O(4)-[O(2)-O(8)]-O(9) <sup>a</sup>  | 37.3 | O(14)-[O(11)-O(18)]-O(15) <sup>a</sup> | 36.9 | 48.2 | 29.5 | 52.4 |
| $\varphi_1$ | O(7)-O(4)-O(10)-O(2) <sup>b</sup>   | 8.4  | O(13)-O(14)-O(16)-O(18) <sup>b</sup>   | 6.0  | 14.1 | 0    | 25.4 |
| $\varphi_2$ | O(9)-O(6)-O(5)-O(8) <sup>b</sup>    | 8.8  | O(15)-O(17)-O(1)-O(11) <sup>b</sup>    | 4.4  | 14.1 | 0    | 25.4 |

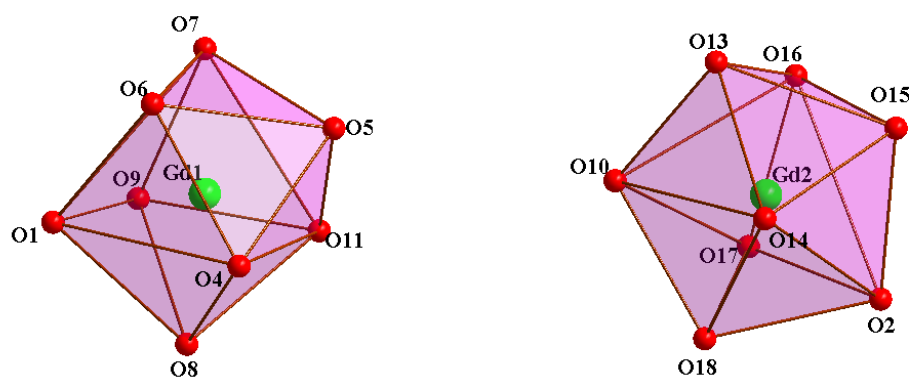

**Figure S11.** The coordination polyhedron of Gd(III) ion in complex **3**.

**Table S2**  $\delta$  ( $^\circ$ ) and  $\varphi$  ( $^\circ$ ) values for complex **3**.

|             | Gd1                                 |      | Gd2                                    |      | TPRS | DD   | SAPR |
|-------------|-------------------------------------|------|----------------------------------------|------|------|------|------|
| $\delta_1$  | O(6)-[O(1)-O(7)]-O(9) <sup>a</sup>  | 19.3 | O(13)-[O(10)-O(14)]-O(18) <sup>a</sup> | 27.8 | 0.0  | 29.5 | 0.0  |
| $\delta_2$  | O(5)-[O(4)-O(11)]-O(8) <sup>a</sup> | 18.7 | O(15)-[O(2)-O(16)]-O(17) <sup>a</sup>  | 17.4 | 21.8 | 29.5 | 0.0  |
| $\delta_3$  | O(6)-[O(4)-O(1)]-O(8) <sup>a</sup>  | 35.5 | O(13)-[O(16)-O(10)]-O(17) <sup>a</sup> | 31.7 | 48.2 | 29.5 | 52.4 |
| $\delta_4$  | O(5)-[O(7)-O(11)]-O(9) <sup>a</sup> | 37.8 | O(15)-[O(2)-O(14)]-O(18) <sup>a</sup>  | 36.5 | 48.2 | 29.5 | 52.4 |
| $\varphi_1$ | O(6)-O(5)-O(1)-O(11) <sup>b</sup>   | 8.0  | O(13)-O(15)-O(10)-O(2) <sup>b</sup>    | 4.6  | 14.1 | 0    | 25.4 |
| $\varphi_2$ | O(9)-O(8)-O(7)-O(4) <sup>b</sup>    | 9.2  | O(18)-O(17)-O(14)-O(16) <sup>b</sup>   | 6.9  | 14.1 | 0    | 25.4 |

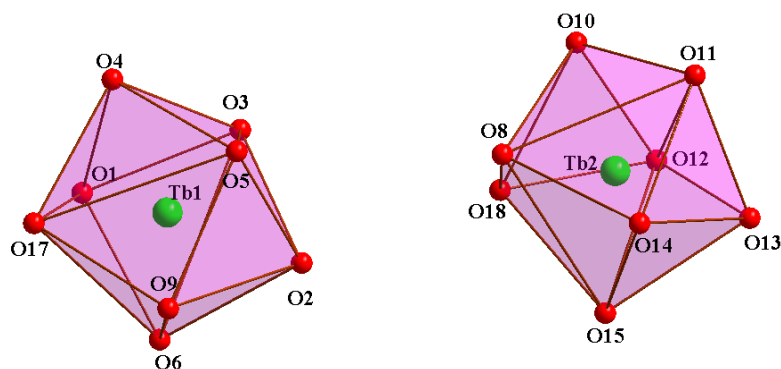

**Figure S12.** The coordination polyhedron of Tb(III) ion in complex **4**.

**Table S3**  $\delta$  ( $^\circ$ ) and  $\varphi$  ( $^\circ$ ) values for complex **4**.

|             | Tb1                                 |      | Tb2                                    |      | TPRS | DD   | SAPR |
|-------------|-------------------------------------|------|----------------------------------------|------|------|------|------|
| $\delta_1$  | O(4)-[O(17)-O(5)]-O(9) <sup>a</sup> | 18.2 | O(10)-[O(11)-O(12)]-O(13) <sup>a</sup> | 18.5 | 0.0  | 29.5 | 0.0  |
| $\delta_2$  | O(1)-[O(3)-O(6)]-O(2) <sup>a</sup>  | 19.1 | O(18)-[O(8)-O(15)]-O(14) <sup>a</sup>  | 28.1 | 21.8 | 29.5 | 0.0  |
| $\delta_3$  | O(4)-[O(5)-O(3)]-O(2) <sup>a</sup>  | 36.7 | O(10)-[O(11)-O(8)]-O(14) <sup>a</sup>  | 31.5 | 48.2 | 29.5 | 52.4 |
| $\delta_4$  | O(1)-[O(6)-O(17)]-O(9) <sup>a</sup> | 35.0 | O(18)-[O(15)-O(12)]-O(13) <sup>a</sup> | 36.4 | 48.2 | 29.5 | 52.4 |
| $\varphi_1$ | O(4)-O(1)-O(5)-O(6) <sup>b</sup>    | 9.4  | O(10)-O(18)-O(11)-O(15) <sup>b</sup>   | 6.3  | 14.1 | 0    | 25.4 |
| $\varphi_2$ | O(9)-O(2)-O(17)-O(3) <sup>b</sup>   | 7.1  | O(13)-O(14)-O(12)-O(8) <sup>b</sup>    | 4.1  | 14.1 | 0    | 25.4 |

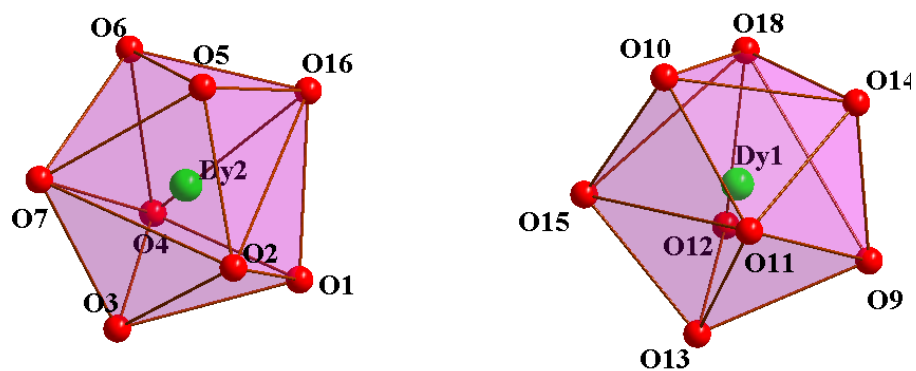

**Figure S13.** The coordination polyhedron of Dy(III) ion in complex **5**.

**Table S4**  $\delta$  ( $^\circ$ ) and  $\varphi$  ( $^\circ$ ) values for complex **5**.

|             | Dy1                                    |      | Dy2                                 |      | TPRS | DD   | SAPR |
|-------------|----------------------------------------|------|-------------------------------------|------|------|------|------|
| $\delta_1$  | O(13)-[O(15)-O(11)]-O(10) <sup>a</sup> | 17.4 | O(3)-[O(7)-O(2)]-O(5) <sup>a</sup>  | 32.3 | 0.0  | 29.5 | 0.0  |
| $\delta_2$  | O(12)-[O(18)-O(9)]-O(14) <sup>a</sup>  | 18.6 | O(1)-[O(4)-O(16)]-O(6) <sup>a</sup> | 36.2 | 21.8 | 29.5 | 0.0  |
| $\delta_3$  | O(13)-[O(11)-O(9)]-O(14) <sup>a</sup>  | 36.9 | O(3)-[O(7)-O(4)]-O(6) <sup>a</sup>  | 27.6 | 48.2 | 29.5 | 52.4 |
| $\delta_4$  | O(12)-[O(15)-O(18)]-O(10) <sup>a</sup> | 36.1 | O(1)-[O(2)-O(16)]-O(5) <sup>a</sup> | 18.7 | 48.2 | 29.5 | 52.4 |
| $\varphi_1$ | O(13)-O(12)-O(11)-O(18) <sup>b</sup>   | 8.0  | O(3)-O(1)-O(7)-O(16) <sup>b</sup>   | 4.6  | 14.1 | 0    | 25.4 |
| $\varphi_2$ | O(10)-O(14)-O(15)-O(9) <sup>b</sup>    | 9.2  | O(5)-O(6)-O(2)-O(4) <sup>b</sup>    | 6.9  | 14.1 | 0    | 25.4 |

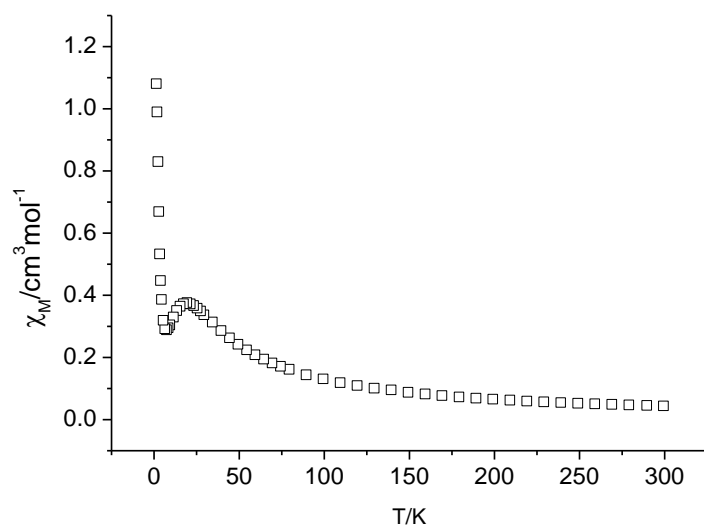

**Figure S14.**  $\chi_M$  versus  $T$  plot for **4**.

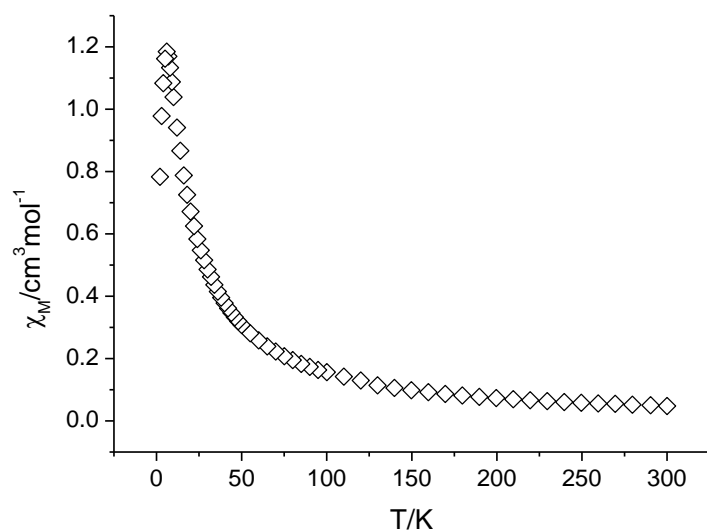

**Figure S15.**  $\chi_M$  versus  $T$  plot for **5**.

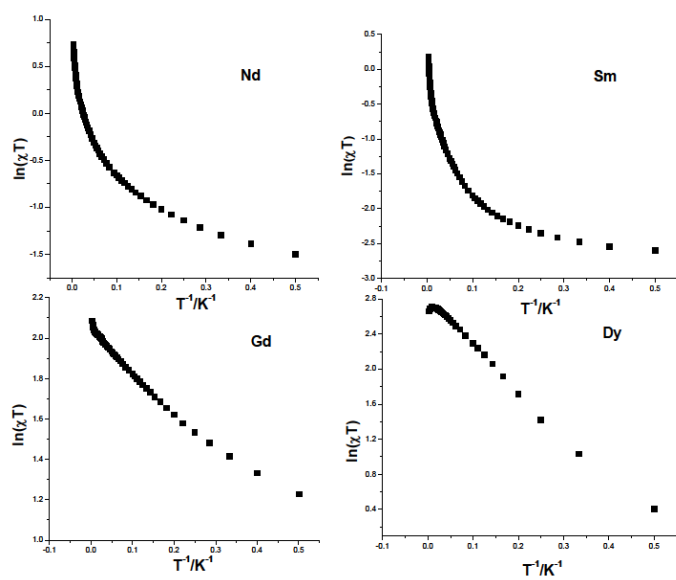

**Figure S16.**  $\ln(\chi T)$  vs.  $1/T$  plot for **1**, **2**, **3** and **5**.

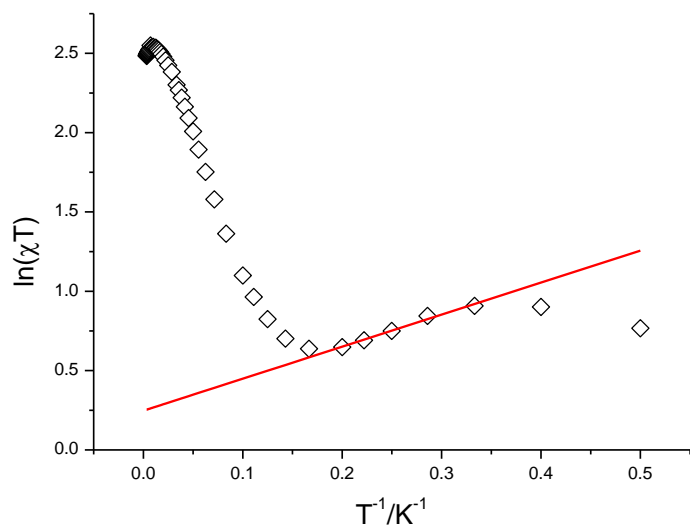

**Figure S17.**  $\ln(\chi T)$  vs.  $1/T$  plot for **4** and the solid line representing the linear fit.

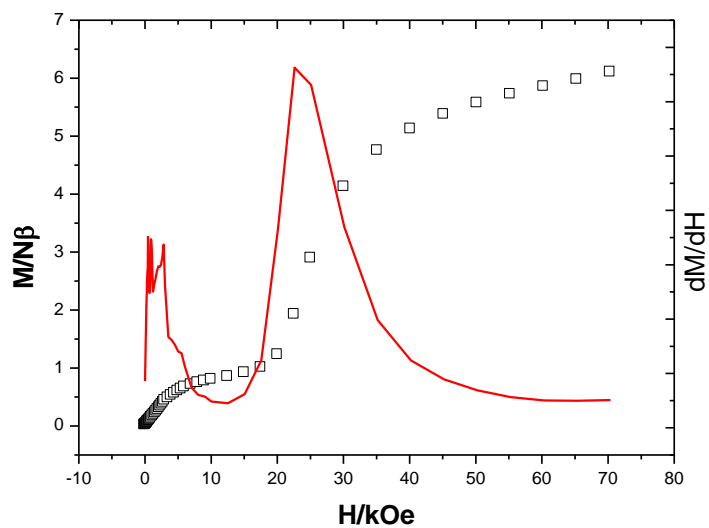

**Figure S18.** Plots of  $M$  vs  $H$  and  $dM/dH$  vs  $H$  for **4** at 2.0K.



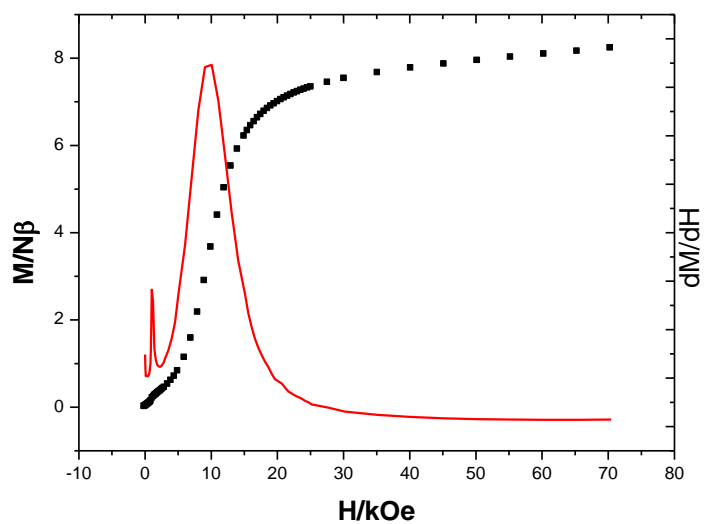

Figure S19. Plots of  $M$  vs  $H$  and  $dM/dH$  vs  $H$  for **5** at 2.0K.

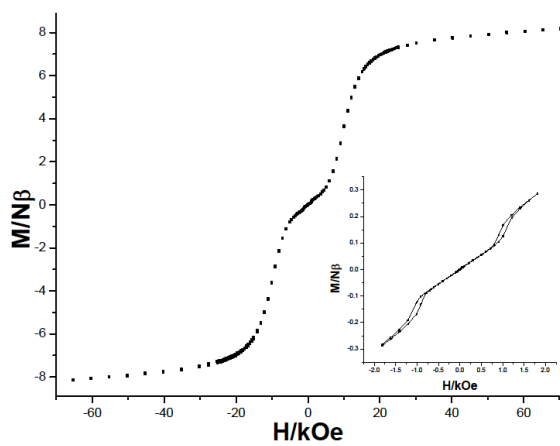

Figure S20. The hysteresis loop at 2.0 K for **5**.

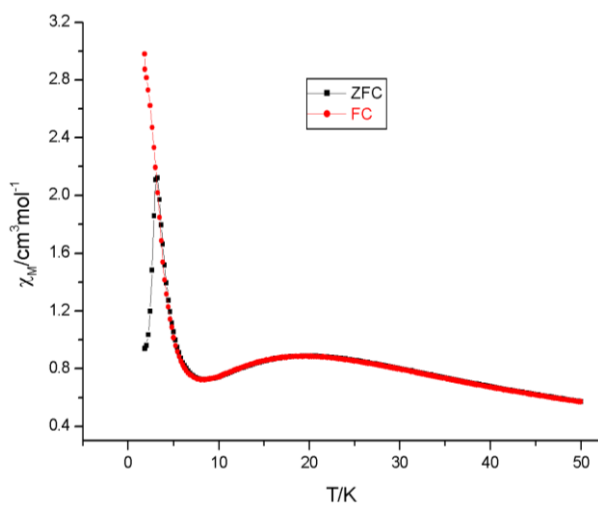

Figure S21 The field-cooled(FC) and Zero-field-cooled(ZFC) susceptibility at 50 Oe for **4**

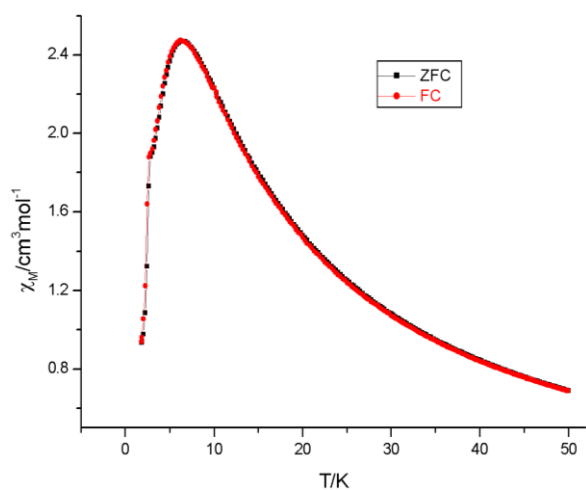

**Figure S22** The field-cooled(FC) and Zero-field-cooled(ZFC) susceptibility at 50 Oe for **5**

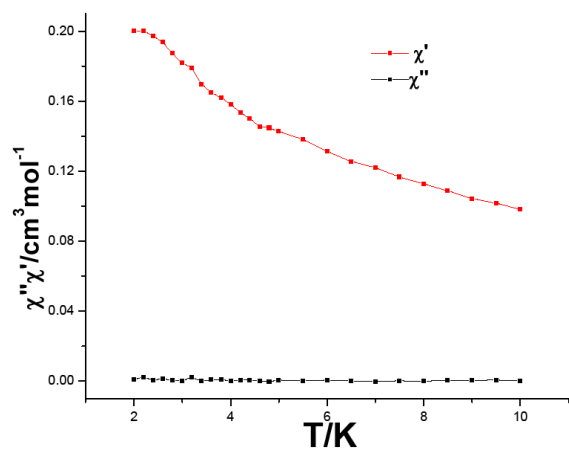

**Figure S23.** Temperature-dependent ac magnetic susceptibility of **1** in zero dc field with an oscillating of 3.5 Oe.

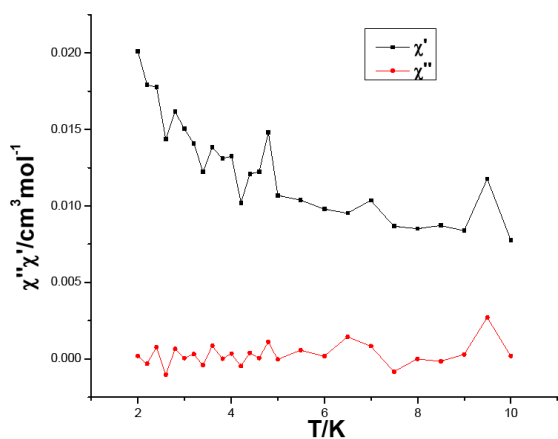

**Figure S24.** Temperature-dependent ac magnetic susceptibility of **2** in zero dc field with an oscillating of 3.5 Oe.

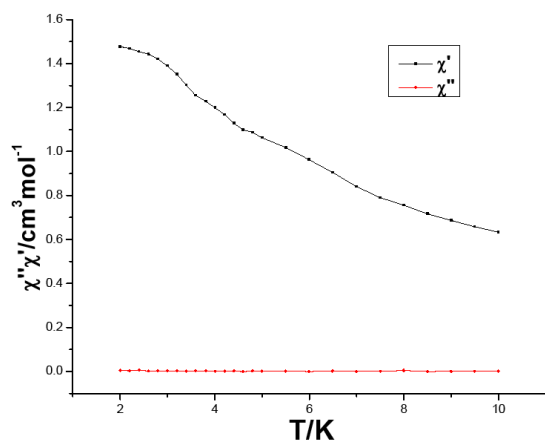

**Figure S25.** Temperature-dependent ac magnetic susceptibility of **3** in zero dc field with an oscillating of 3.5 Oe.
